# Supplementary material for: Synthesis and Deposition of Thermochromic VO2 Thin Films from Peroxide-based Chemical Solutions
Source: Preprints.org preprint supplement (doi:10.20944/preprints202101.0333.v2), 2021-02-17
Supplement: Supplementary file 4 [file supplementary]

Supplementary material

Ellipsometry fitting results


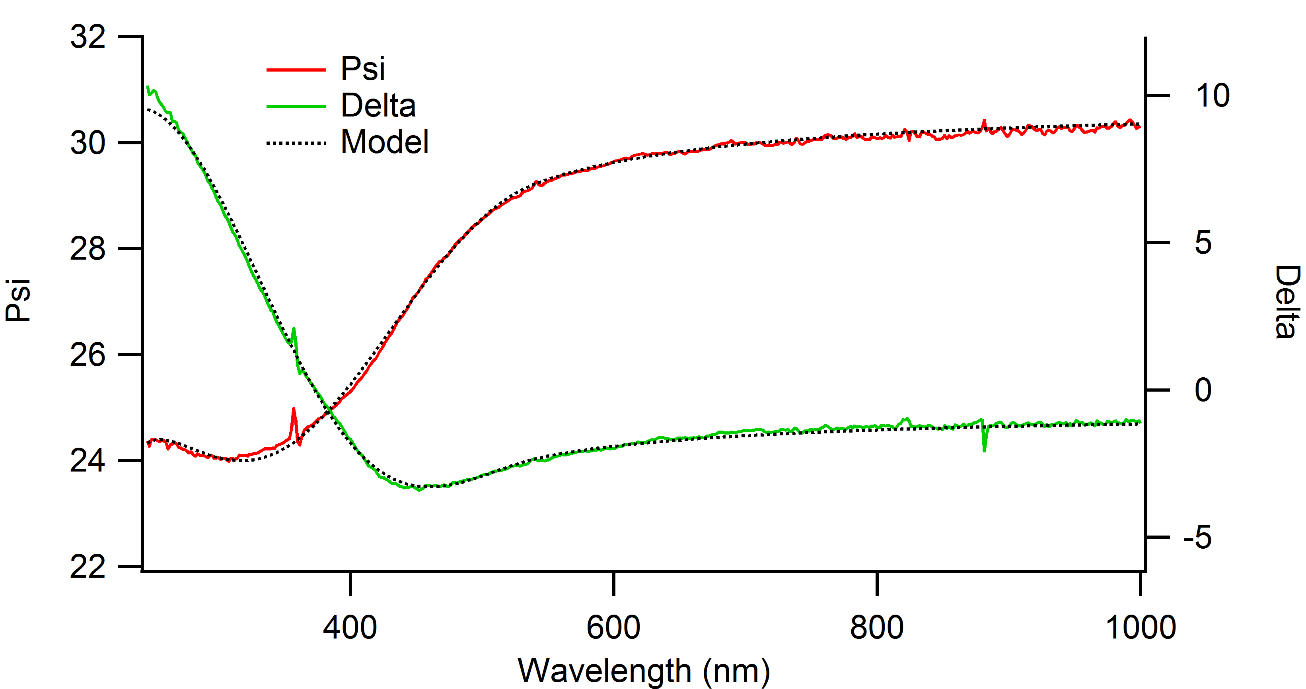


**Figure 1:** Thickness fitting of sample A


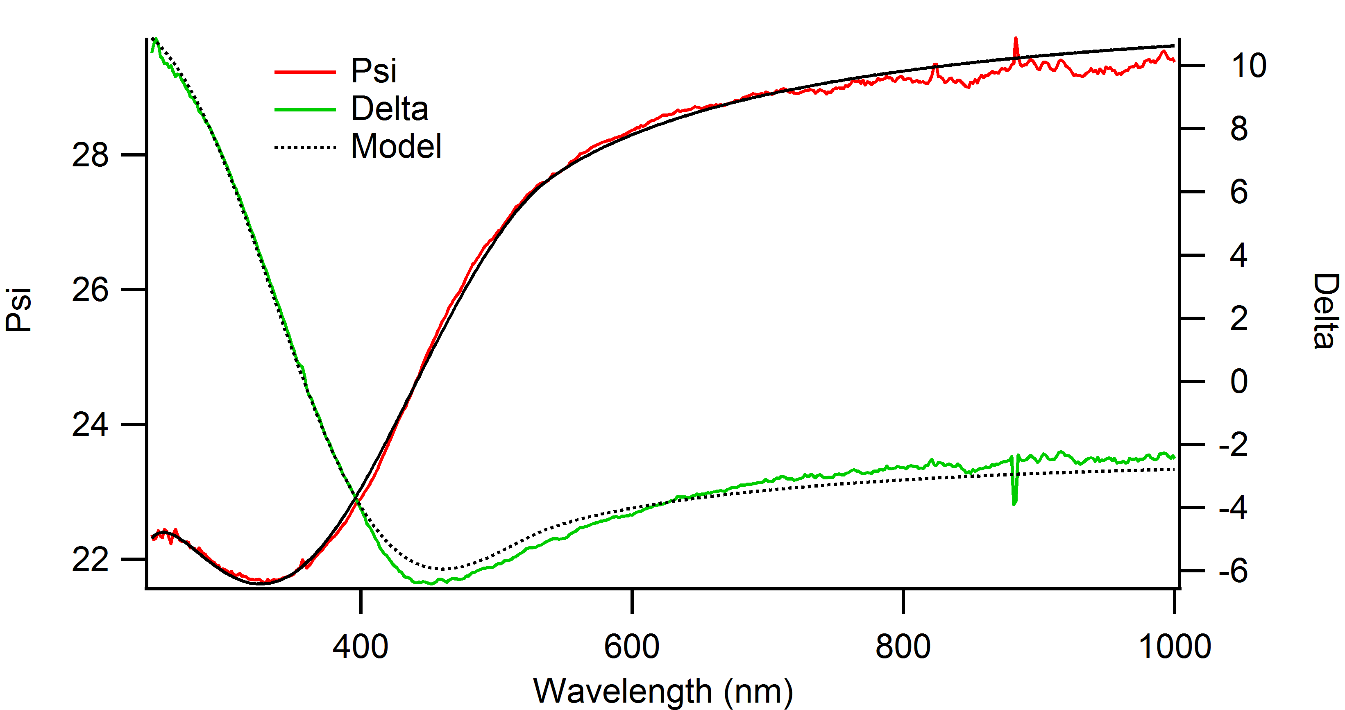


**Figure 2:** Thickness fitting of sample B


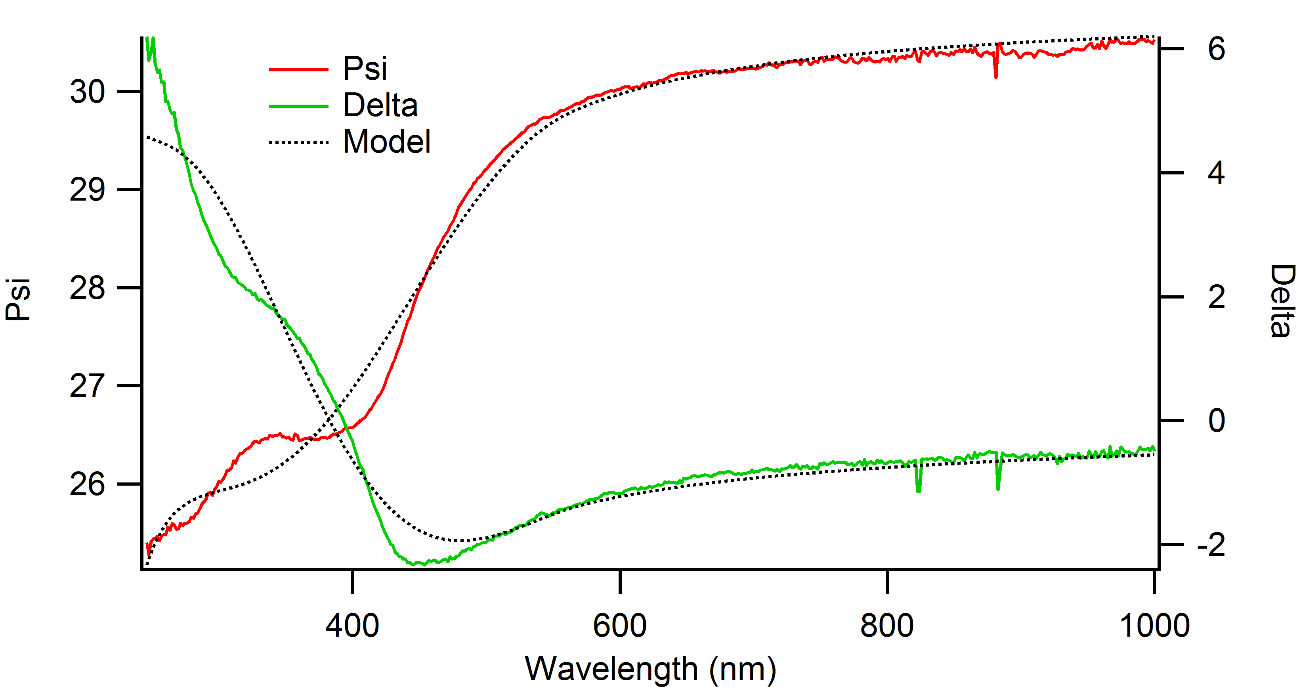


**Figure 3:** Thickness fitting of sample C


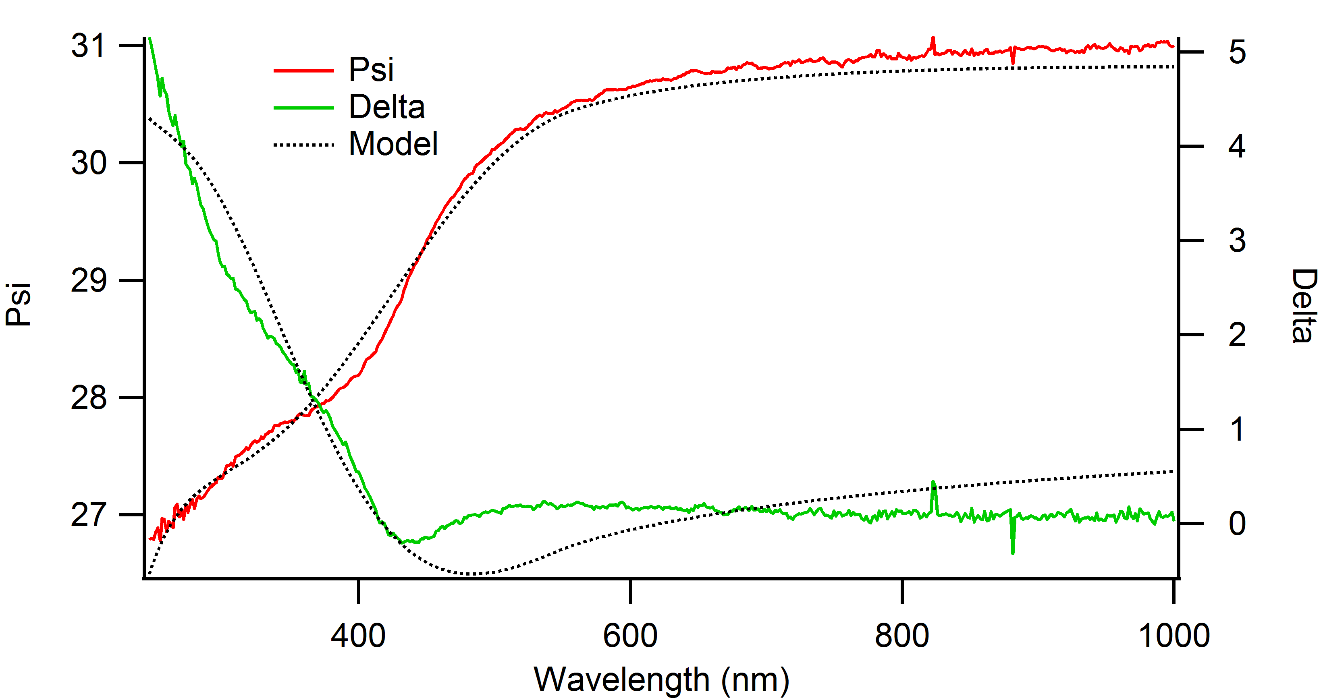


**Figure 4:** Thickness fitting of sample D
